# Supplementary material for: Dairy Consumption, Type 2 Diabetes, and Changes in Cardiometabolic Traits: A Prospective Cohort Study of Middle-Aged and Older Chinese in Beijing and Shanghai
Source: Oxford University Press journal article supplement (doi:10.2337/dc13-0975), 2013-09-12
Supplement: dc130975supplementarydata.pdf [file dc130975supplementarydata.pdf]

SUPPLEMENTARY DATA

**Supplementary Table 1.** Stratified analysis on associations between total dairy intake and risk of diabetes\*.

|                        | Dairy product consumption (serving/day) |                 |                 |                 | P for trend | P for interaction |
|------------------------|-----------------------------------------|-----------------|-----------------|-----------------|-------------|-------------------|
|                        | None                                    | <0.5            | 0.5-1           | >1              |             |                   |
| Age                    |                                         |                 |                 |                 |             | 0.80              |
| <59 years              | 1                                       | 0.98(0.76,1.28) | 0.81(0.59,1.11) | 0.73(0.50,1.06) | 0.06        |                   |
| ≥59 years              | 1                                       | 0.96(0.73,1.27) | 0.63(0.45,0.87) | 0.63(0.44,0.90) | 0.002       |                   |
| Sex                    |                                         |                 |                 |                 |             | 0.06              |
| Men                    | 1                                       | 1.18(0.89,1.56) | 0.85(0.59,1.24) | 0.90(0.60,1.36) | 0.44        |                   |
| Women                  | 1                                       | 0.78(0.60,1.02) | 0.66(0.48,0.86) | 0.56(0.40,0.79) | <0.001      |                   |
| BMI                    |                                         |                 |                 |                 |             | 0.31              |
| < 25 kg/m <sup>2</sup> | 1                                       | 1.07(0.79,1.45) | 0.75(0.52,1.09) | 0.69(0.44,1.07) | 0.06        |                   |
| ≥ 25 kg/m <sup>2</sup> | 1                                       | 0.85(0.67,1.09) | 0.67(0.51,0.90) | 0.63(0.46,0.87) | 0.001       |                   |
| HOMA-IR                |                                         |                 |                 |                 |             | 0.13              |
| ≤ 3.23                 | 1                                       | 0.91(0.66,1.25) | 0.88(0.61,1.27) | 0.74(0.58,1.15) | 0.19        |                   |
| > 3.23                 | 1                                       | 0.98(0.78,1.24) | 0.62(0.46,0.83) | 0.60(0.44,0.83) | <0.001      |                   |

Abbreviations: HOMA-IR, homeostasis model assessment for insulin resistance.

\* Relative risk (95% confidential intervals) and P values were estimated in log-Poisson model after adjustment of all covariates in model 3 of table 2, where appropriate.

**Supplementary Table 2.** Spearman correlation coefficients of *trans* fatty acids with dairy products\*.

|                           | <i>Trans</i> -18:1 isomers | 18:2n6 9c12t | 18:2n6 9t12c |
|---------------------------|----------------------------|--------------|--------------|
| Erythrocyte 18:2n6 9c12t  | 0.38                       |              |              |
| Erythrocyte 18:2n6 9t12c  | 0.33                       | 0.83         |              |
| Total dairy product †     | 0.37                       | 0.21         | 0.23         |
| Milk                      | 0.35                       | 0.19         | 0.18         |
| Dairy product except milk | 0.23                       | 0.13         | 0.16         |

\* Spearman correlations were calculated after adjustment of age, sex and total energy intake, all P values<0.001.

† Total dairy product included milk, milk powder, yogurt, ice cream, milk flake, cheese, cream, and cream cake.

SUPPLEMENTARY DATA

**Supplementary Table 3.** Relative risks of diabetes according to dairy consumption groups, by including HbA1c  $\geq 6.5\%$  as a further criterion to define diabetes\*.

|                                  | Dairy product consumption (serving/day) |                 |                 |                 | <i>P</i> |
|----------------------------------|-----------------------------------------|-----------------|-----------------|-----------------|----------|
|                                  | None                                    | $\leq 0.5$      | 0.5-1.0         | $> 1$           |          |
| Total dairy products             | None                                    | $\leq 0.5$      | 0.5-1.0         | $> 1$           |          |
| Case/Participants                | 386/857                                 | 199/445         | 159/381         | 135/320         |          |
| Model 1 †                        | 1                                       | 0.93(0.82,1.06) | 0.86(0.74,1.00) | 0.85(0.72,1.01) | 0.026    |
| Model 2                          | 1                                       | 0.93(0.82,1.06) | 0.85(0.73,0.98) | 0.83(0.70,0.98) | 0.012    |
| Model 3                          | 1                                       | 0.91(0.80,1.03) | 0.87(0.75,1.00) | 0.86(0.73,1.00) | 0.027    |
| Model 4                          | 1                                       | 0.91(0.81,1.03) | 0.89(0.78,1.02) | 0.93(0.80,1.09) | 0.19     |
| Milk                             | None                                    | $\leq 0.5$      | $> 0.5$         |                 |          |
| Case/Participants                | 506/1132                                | 140/317         | 233/554         |                 |          |
| Model 1                          | 1                                       | 0.91(0.79,1.05) | 0.86(0.76,0.98) |                 | 0.02     |
| Model 2                          | 1                                       | 0.91(0.79,1.04) | 0.86(0.75,0.97) |                 | 0.013    |
| Model 3                          | 1                                       | 0.90(0.78,1.03) | 0.89(0.79,1.00) |                 | 0.045    |
| Model 4                          | 1                                       | 0.92(0.81,1.04) | 0.96(0.85,1.08) |                 | 0.40     |
| Total dairy products except milk | None                                    | $\leq 0.5$      | $> 0.5$         |                 |          |
| Case/Participants                | 556/1265                                | 244/552         | 79/186          |                 |          |
| Model 1                          | 1                                       | 1.01(0.90,1.14) | 0.95(0.79,1.15) |                 | 0.79     |
| Model 2                          | 1                                       | 1.01(0.90,1.13) | 0.93(0.77,1.12) |                 | 0.62     |
| Model 3                          | 1                                       | 0.98(0.88,1.09) | 0.90(0.75,1.09) |                 | 0.31     |
| Model 4                          | 1                                       | 0.97(0.87,1.07) | 0.94(0.79,1.13) |                 | 0.43     |

\* Relative risks (95% confidential intervals) and *P* for trend of diabetes were calculated using log-Poisson model;

† Covariates included: model 1, age, sex, region, and residence; Model 2, further adjusted for smoking (current, past, never), family history of diabetes, BMI, dietary fiber intakes based on model 1; Model 3, further adjusted for changes in BMI and waistline based on model 2 (n=1825); Model 4, further adjusted for changes in glucose based on model 3 (n=1816).

SUPPLEMENTARY DATA

**Supplementary Table 4.** Relative risks of diabetes according to erythrocyte *trans*-18:1 isomers quartiles, by including HbA1c  $\geq 6.5\%$  as a further criterion to define diabetes\*.

|                               | Quartile 1(     | Quartile 2      | Quartile 3      | Quartile 4      | <i>P</i> |
|-------------------------------|-----------------|-----------------|-----------------|-----------------|----------|
| <i>Trans</i> -18:1 isomers, % | 0.13 $\pm$ 0.02 | 0.17 $\pm$ 0.01 | 0.21 $\pm$ 0.01 | 0.28 $\pm$ 0.05 |          |
| Case                          | 221/495         | 232/495         | 219/495         | 200/494         |          |
| Model 1†                      | 1               | 1.00(0.87,1.15) | 0.94(0.82,1.08) | 0.86(0.74,0.99) | 0.03     |
| Model 2                       | 1               | 0.99(0.87,1.14) | 0.96(0.84,1.11) | 0.90(0.77,1.05) | 0.16     |
| Model 3                       | 1               | 1.00(0.87,1.14) | 0.97(0.84,1.12) | 0.92(0.79,1.08) | 0.30     |

\* Relative risks (95% confidential intervals) and *P* for trend of diabetes were calculated using log-Poisson model;

† Covariates included: model 1, age, sex, region, and residence; model 2, further adjusted by smoking, family history of diabetes, BMI, dietary fiber intakes, and erythrocyte *trans* 18:2n-6 9c12t and *trans* 18:2n-6 9t12c based on model 1; model 3, further adjusted by total dairy product consumption based on model 2.
